# Supplementary material for: Accounting for symptom heterogeneity can improve neuroimaging models of antidepressant response after electroconvulsive therapy
Source: PubMed Central journal article supplement (PMC8519875; doi:10.1002/hbm.25620), 2021-08-13

Folds 1-9 / Training Data

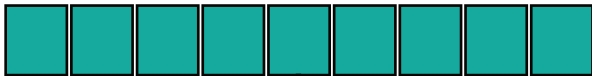

Test Data

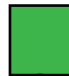

Adjust Neuroimaging Data for  
Clinical & Demographic Effects

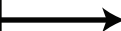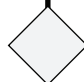

Site Harmonization with ComBat

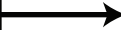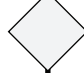

Fit RFR Model

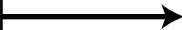

Predict Test  
Data

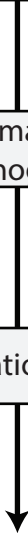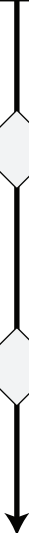

Supplement: HBM-42-5322-s004.pdf [file HBM-42-5322-s004.pdf]
