# Supplementary material for: Accounting for symptom heterogeneity can improve neuroimaging models of antidepressant response after electroconvulsive therapy
Source: PubMed Central journal article supplement (PMC8519875; doi:10.1002/hbm.25620), 2021-08-13

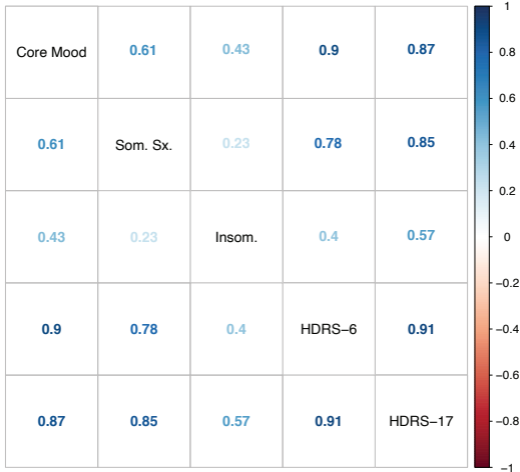

Supplement: HBM-42-5322-s007.pdf [file HBM-42-5322-s007.pdf]
